# Supplementary material for: Ion exchange in alginate gels – dynamic behaviour revealed by electron paramagnetic resonance
Source: Royal Society of Chemistry journal article supplement (doi:10.1039/c5sm02062j), 2015-01-01
Supplement: c5sm02062j1.pdf [file c5sm02062j1.pdf]

**Ion exchange in alginate gels – dynamic behaviour revealed by electron paramagnetic resonance**

G. Ionita, A. M. Ariciu, D. K. Smith and V. Chechik

**Supplementary information.**

|                                                                                                                |   |
|----------------------------------------------------------------------------------------------------------------|---|
| Fig. S1: EPR spectra of 4NH <sub>2</sub> T-ALG-L solutions.                                                    | 2 |
| Fig. S2: EPR spectra of 4NH <sub>2</sub> T-ALG-L solutions.                                                    | 2 |
| Fig. S3: The effect of alginate concentration on EPR spectra of 4NH <sub>2</sub> T-ALG-L                       | 3 |
| Fig. S4: The effect of alginate concentration on EPR spectra of 4NH <sub>2</sub> T-ALG-VL                      | 3 |
| Fig. S5: The EPR spectra of 4NH <sub>2</sub> T-ALG-L in different solutions                                    | 4 |
| Fig. S6: EPR spectrum of the gel phase after diffusion of VO <sup>2+</sup> into Zn <sup>2+</sup> -alginate gel | 5 |
| Fig. S7: EPR spectra of solution after mixing labelled gel with unlabelled alginate                            | 6 |

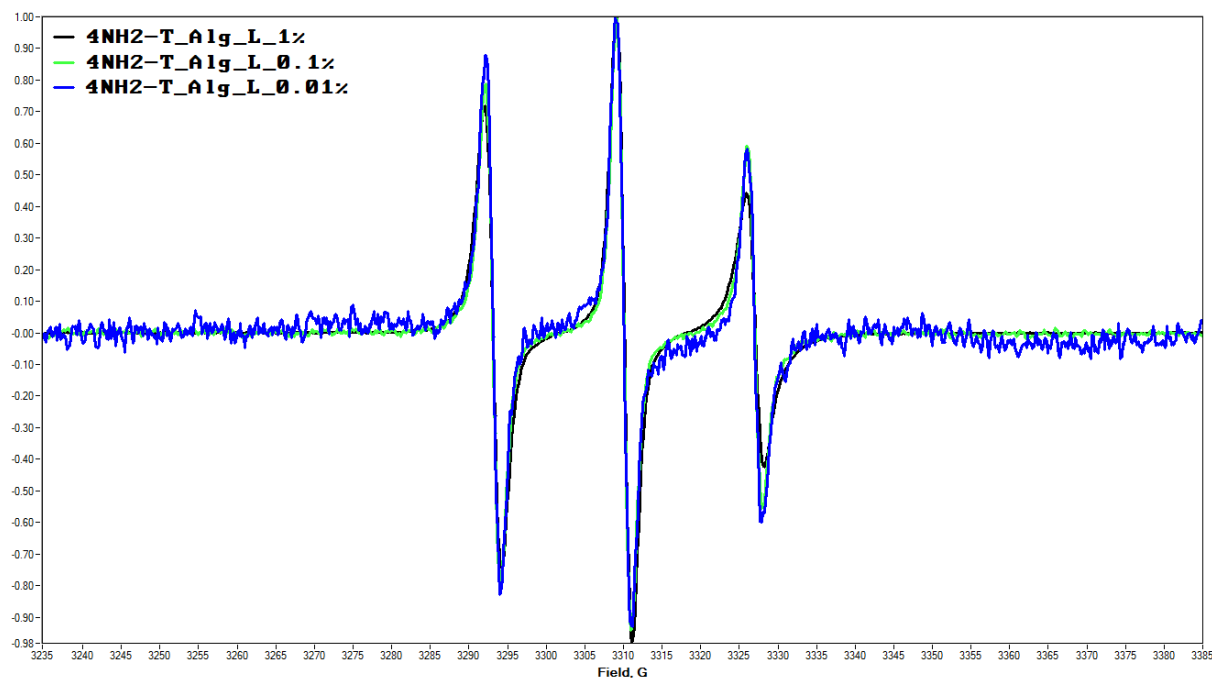

Fig. S1: EPR spectra of 4NH<sub>2</sub>T-ALG-L solutions. Line broadening was observed at 1% concentration. This was reduced when the concentration used was 0.1 %

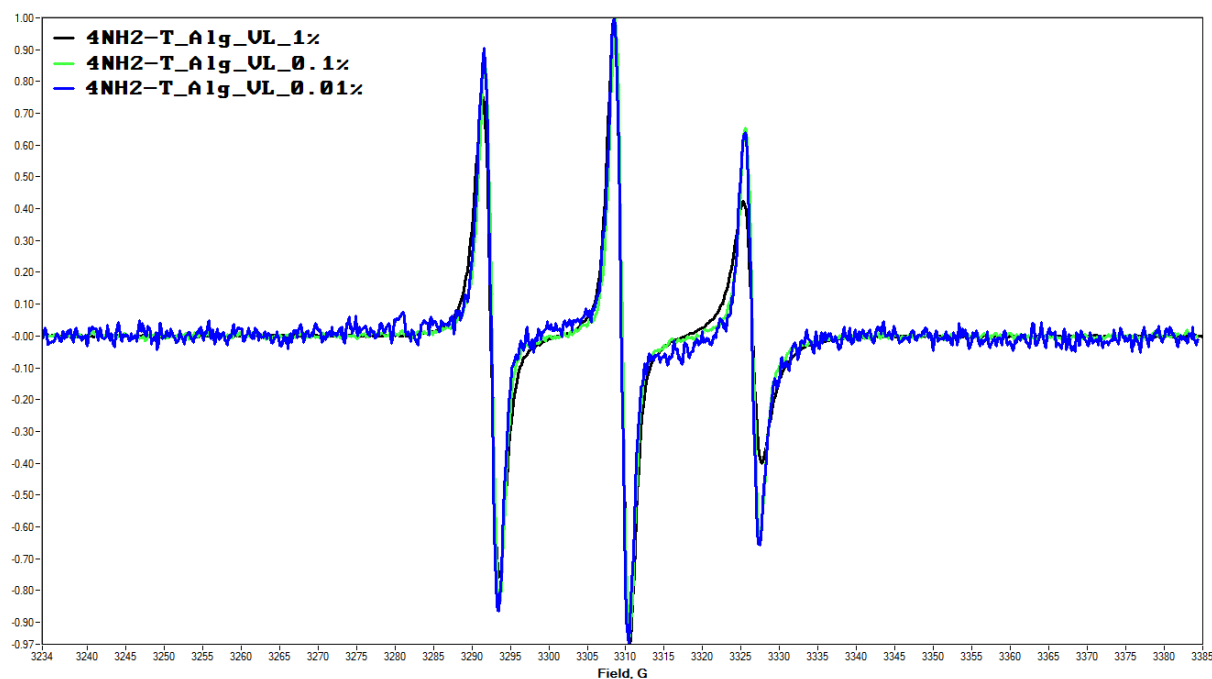

Fig. S2: EPR spectra of 4NH<sub>2</sub>T-ALG-L solutions. Line broadening was observed at 1% concentration. This was reduced when the concentration used was 0.1 %

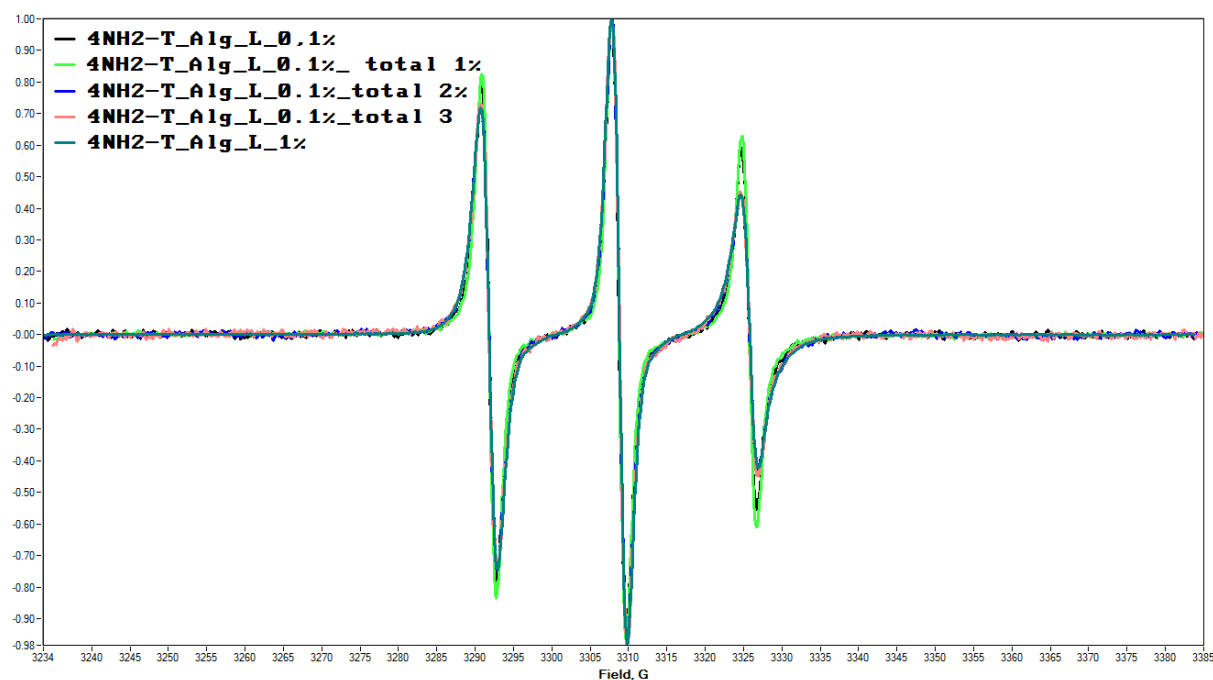

Fig. S3: The effect of alginate concentration on EPR spectra of 4NH<sub>2</sub>T-ALG-L

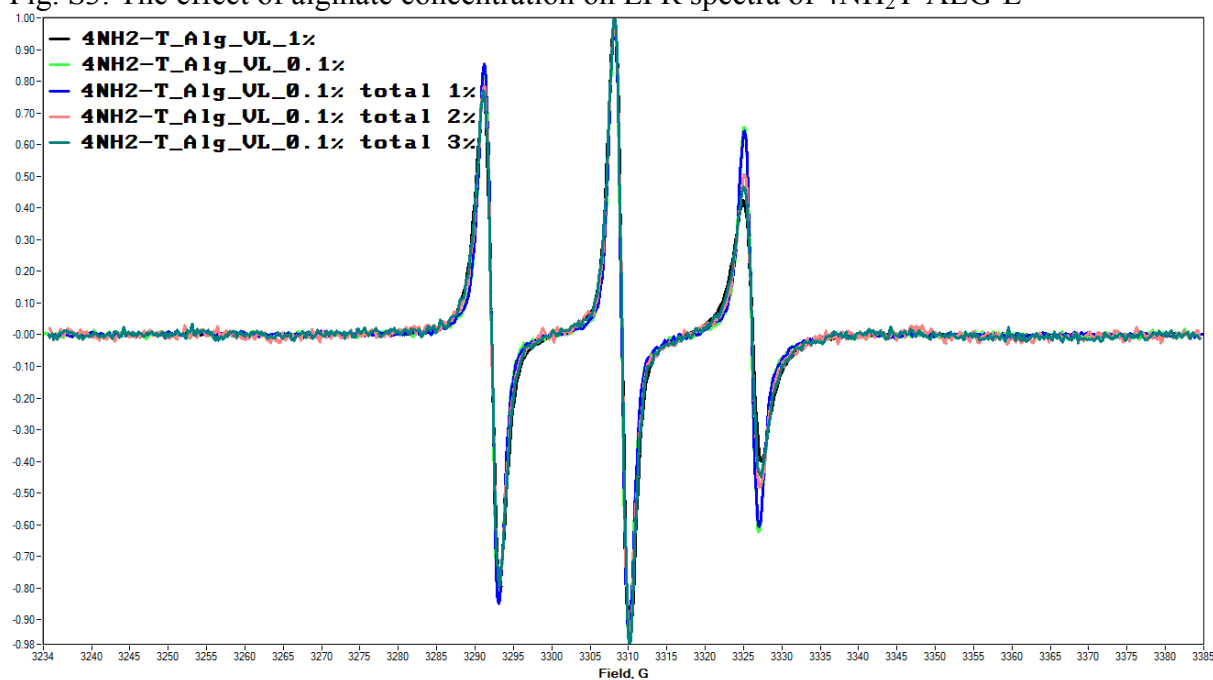

Fig. S4: The effect of alginate concentration on EPR spectra of 4NH<sub>2</sub>T-ALG-VL

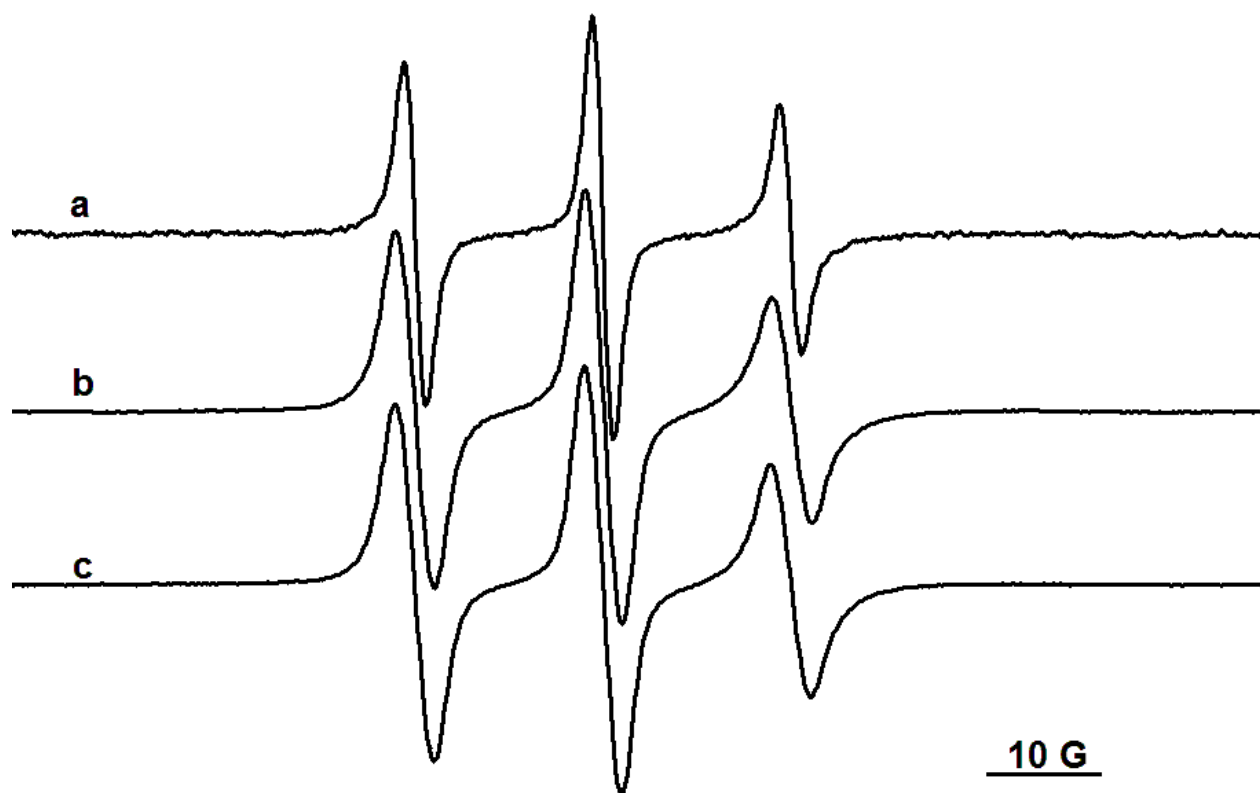

Fig. S5: The EPR spectra of 4NH<sub>2</sub>T-ALG-L in: (a) 1% alginic acid, (b) in EDTA 2M, (c) alginic acid 1% in 4M NaCl

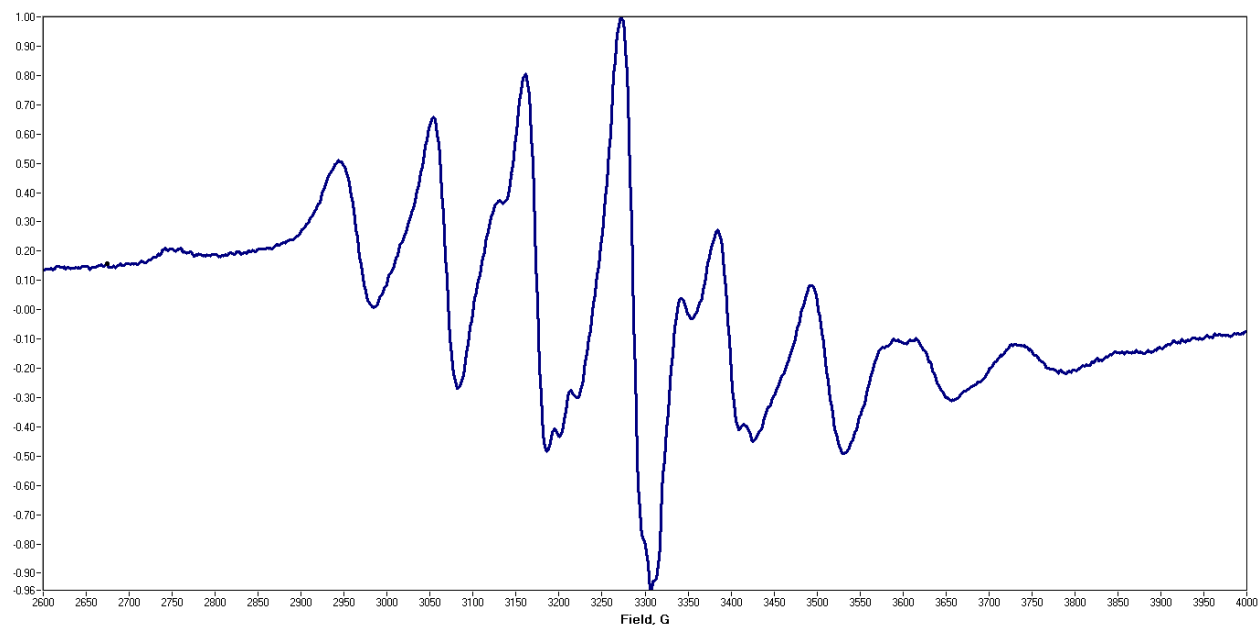

Fig. S6: EPR spectrum of the gel phase after diffusion of  $\text{VO}^{2+}$  into  $\text{Zn}^{2+}$ -alginate gel shows evidence of some immobilised  $\text{VO}^{2+}$ .

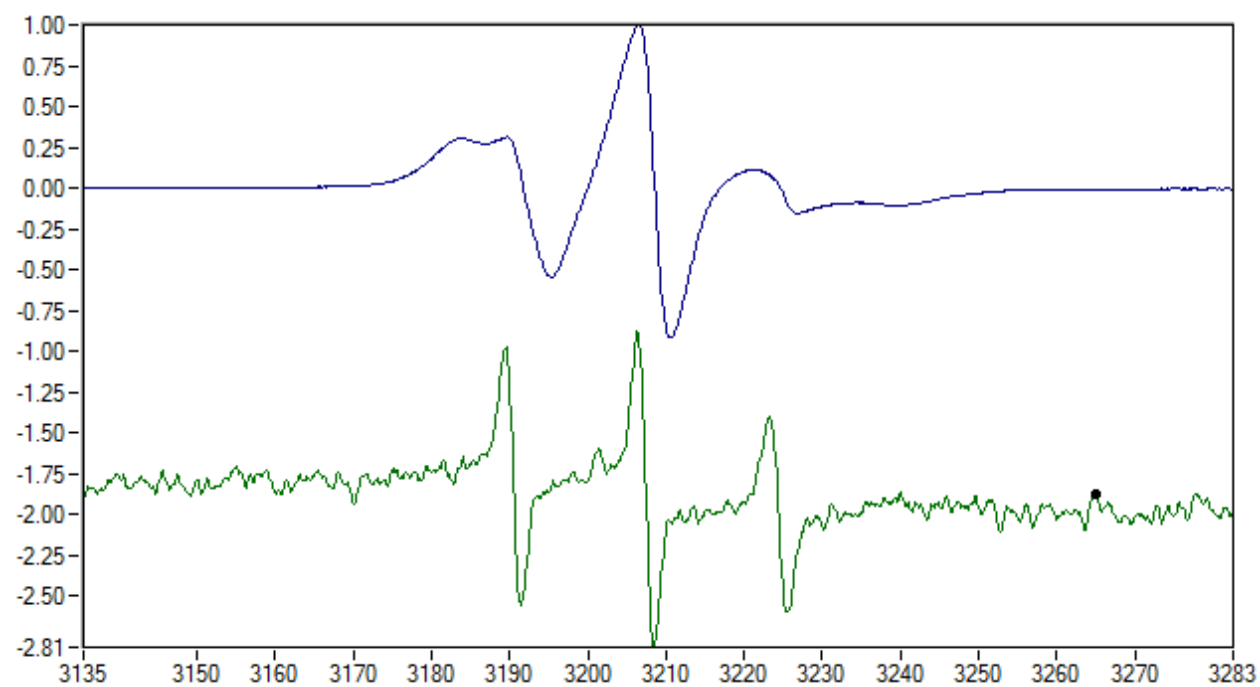

Fig. S7: EPR spectrum of the solution phase after a spin-labelled  $\text{Ca}^{2+}$ -alginate gel (blue) was mixed with a 2% solution of unlabelled alginate.
